# Supplementary material
Source: Springer Nature journal article supplement (https://www.springermedizin.de/resource/supplementary/12967_2012_999_MOESM1_ESM.pdf/9573276)

**A**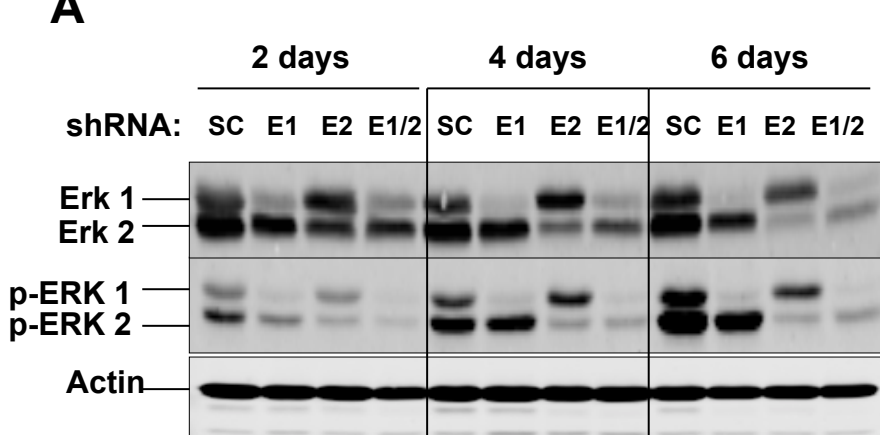

| shRNA   | 4 days |       |       |         |
|---------|--------|-------|-------|---------|
|         | SC     | Erk 1 | Erk 2 | Erk 1+2 |
| Erk 1   | 100    | 11.3  | 118   | 26.2    |
| Erk 2   | 100    | 80.3  | 28.3  | 38.1    |
| p-Erk 1 | 100    | 17.3  | 119.5 | 4.7     |
| P-Erk 2 | 100    | 82.3  | 14.8  | 10.6    |
| Actin   | 100    | 111   | 91    | 96      |

**B**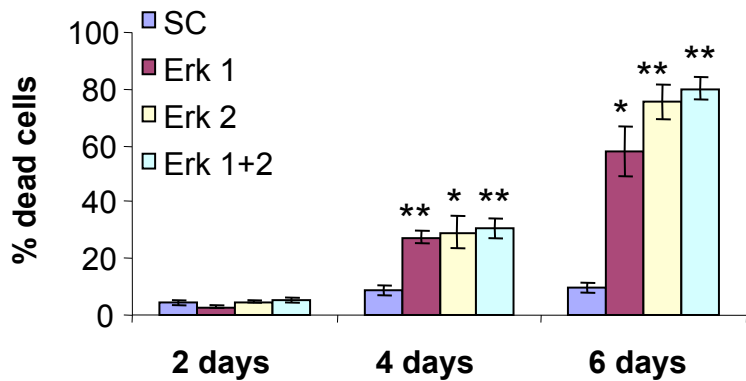**C**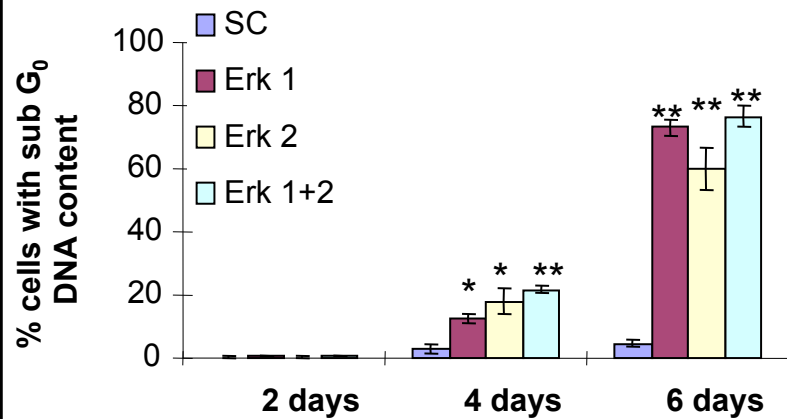

Supplement: MOESM1 [file 9573276]
